# Supplementary material for: Polyphenol oxidase cross-linking enhances whey protein-induced systemic food allergy by regulating miRNA in CD4+ T cells
Source: Royal Society of Chemistry journal article supplement (doi:10.1039/d4fo05284f), 2024-12-19

**Supplementary Figure 1. Pearson correlation between samples**

**Supplementary Figure 2. The length distribution of the identified miRNA**

Supplementary Figure 1

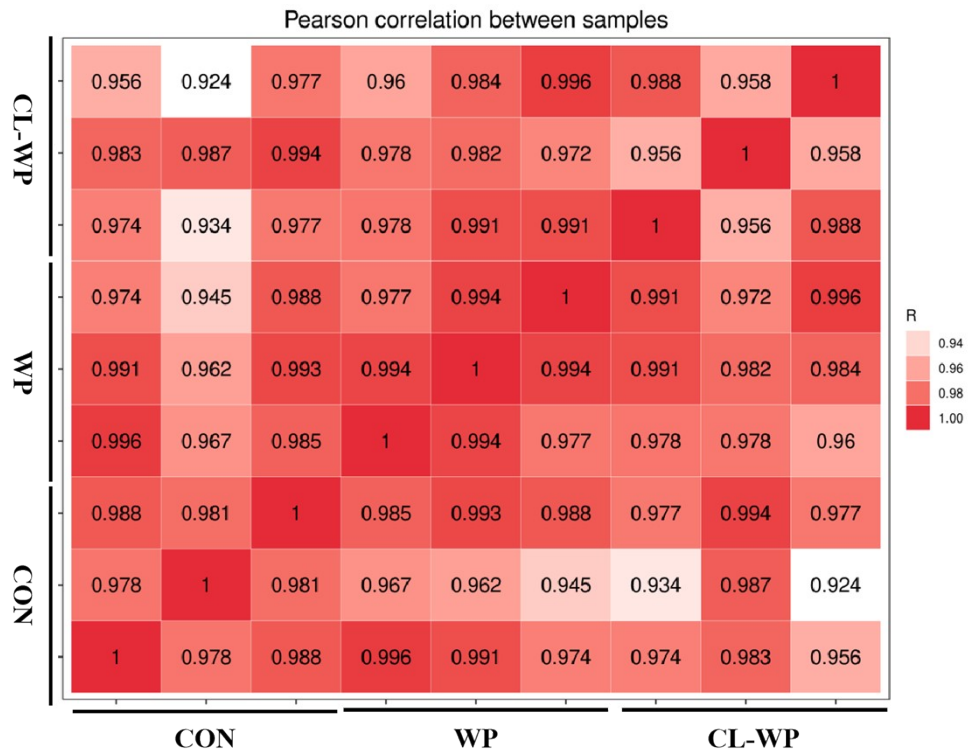

Supplementary Figure 2

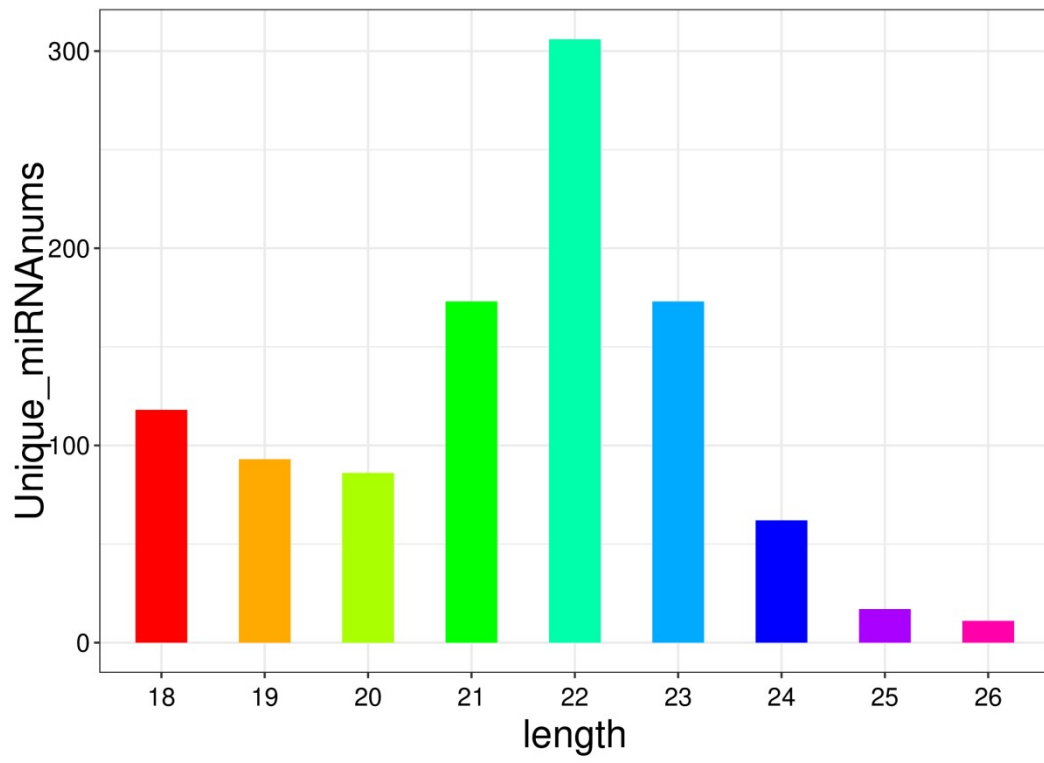

Supplement: d4fo05284f1.pdf [file d4fo05284f1.pdf]
